# Supplementary material
Source: Springer Nature journal article supplement (https://www.springermedizin.de/resource/supplementary/12889_2011_4023_MOESM1_ESM.pdf/9490982)

## Geoprocessing

GIS: Geographic Information System

GPS: Global Positioning System

RS: Remote Sensing

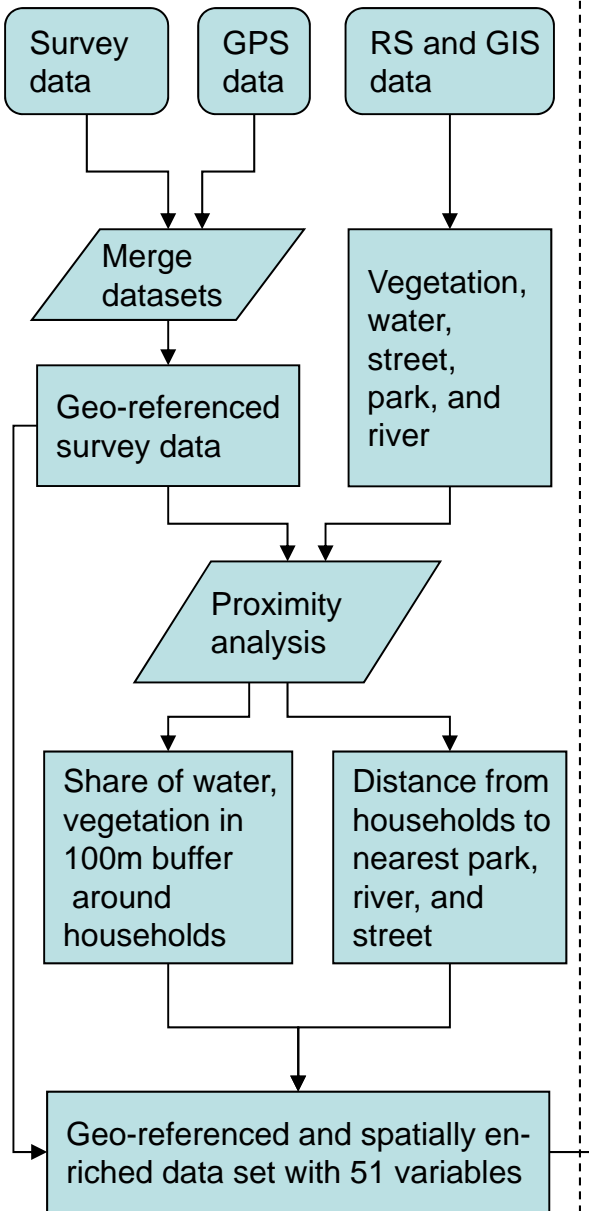

## Factor analysis

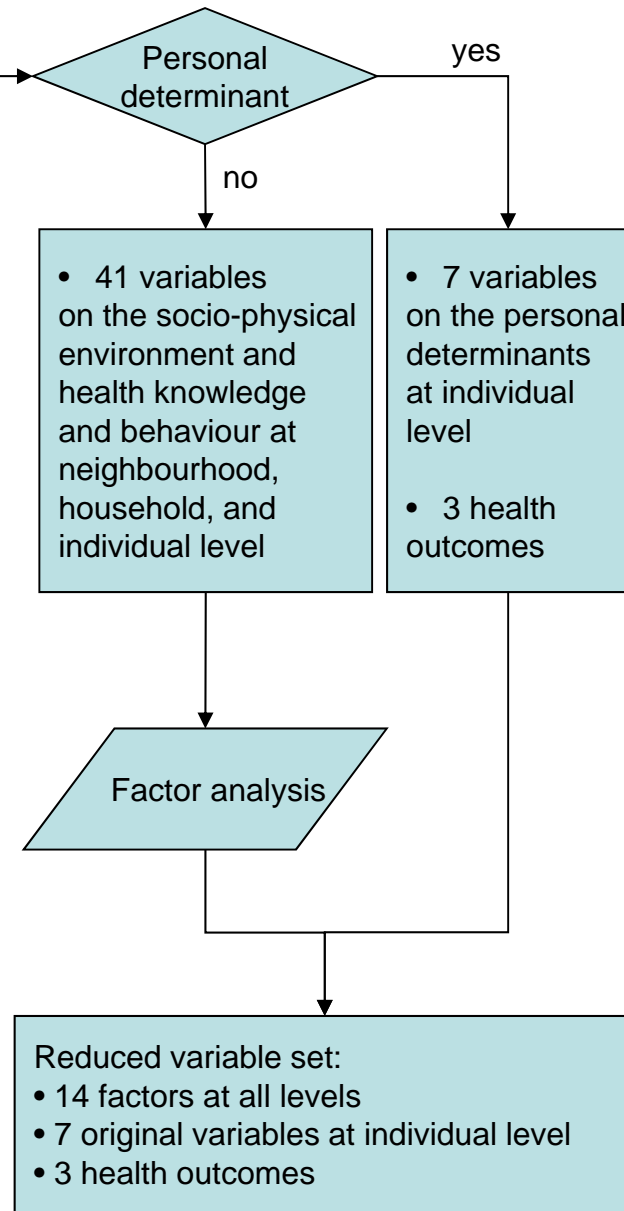

## Pearson correlation and generalised linear regression (GLM)

WHO-5: Well-being Index

AIC: Akaike Information Criterion

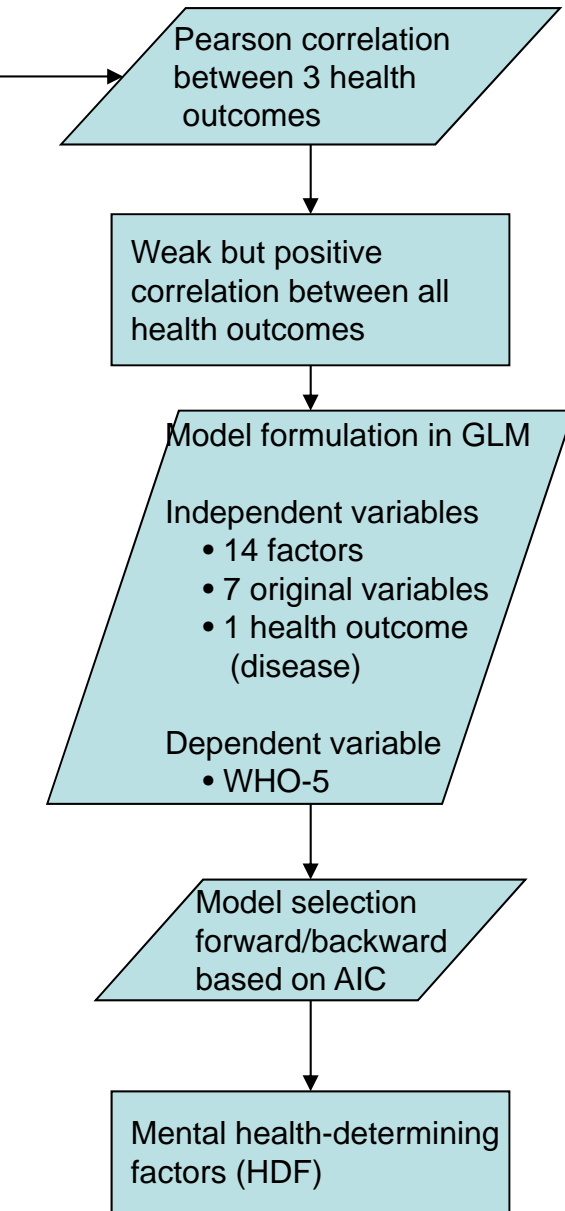

Supplement: MOESM1 [file 9490982]
